# Supplementary material
Source: Research Square preprint supplement (doi:10.21203/rs.3.rs-9261962/v1)
Supplement: Supplementary file 2 [file 9d050c8919dd41ec5c7ec40a.pdf]

exp Artificial Intelligence/  
exp Machine Learning/  
exp Natural Language Processing/  
exp Deep Learning/  
(artificial intelligence or AI).ti,ab,kf.  
(machine learning or deep learning).ti,ab,kf.  
(natural language processing or NLP).ti,ab,kf.  
(generative AI or generative artificial intelligence).ti,ab,kf.  
(large language model\* or LLM or LLMs).ti,ab,kf.  
(ChatGPT or GPT-3 or GPT-4 or transformer model\*).ti,ab,kf.  
(AI-driven or AI-based or AI-assisted).ti,ab,kf.  
or/1-11  
Debrief\*.mp.  
(debrief\* or "after action review\*" or AAR).ti,ab,kf.  
(post-simulation discussion or reflective discussion\*).ti,ab,kf.  
(structured reflection or facilitated reflection).ti,ab,kf.  
or/13-16  
exp Simulation Training/  
exp Patient Simulation/  
exp Manikins/  
(simulation-based or simulation training or simulated  
scenario\*).ti,ab,kf.  
(high-fidelity simulation or low-fidelity simulation).ti,ab,kf.  
(clinical simulation or healthcare simulation).ti,ab,kf.  
or/18-23  
exp Education, Medical/  
exp Education, Nursing/  
exp Students, Health Occupations/  
exp Clinical Competence/  
(healthcare education or medical education or nursing education or  
health professions education).ti,ab,kf.  
(clinical training or professional development).ti,ab,kf.  
exp Education, Public Health Professional/  
or/25-31  
12 and 17 and 24 and 32
