# Supplementary material
Source: Research Square preprint supplement (doi:10.21203/rs.3.rs-9261962/v1)
Supplement: Supplementary file 2 [file 915e1d9cddd0194456c96541.xlsx]

## Sheet: TABLE 3
Study	AI Function in Debriefing	Purpose of AI Use	Type of AI Method	Reported Outcomes	Key Limitations
Brutschi et al. (2024)	Automated speech transcription and speaker diarization for interaction analysis	To quantify communication and interaction patterns during debriefing	Speech recognition + speaker diarization algorithms	Identification of communication metrics; feasibility of automated interaction mapping	Accuracy dependent on audio quality; no learning outcome measures
Vaughn et al. (2025)	Generative AI facilitator coaching support	To assist debriefers in structuring reflective questioning	Large language model (ChatGPT-based tool)	Reported feasibility and perceived usefulness for faculty development	Pilot design; no objective learner outcome measures
Jang et al. (2025)	Prompt-engineered instructional model for AI-supported debriefing	To guide structured AI-assisted debriefing question generation	Prompt engineering model using generative AI	Model validation; structured question generation	Conceptual model; limited empirical testing
Gonzalez & Nagendran (2025)	Autonomous AI-led reflective dialogue	To conduct AI-facilitated reflective debriefing	Generative AI conversational agent	Positive learner perceptions; feasibility of AI-led reflection	Small sample; no comparative outcomes; human oversight required
Rosser et al. (2023)	NLP-based automated discourse coding	To assess changes in teamwork communication post-debriefing	Natural language processing algorithms	Significant improvement in selected communication behaviors; alignment with T-NOTECHS	Manual transcription required; not real-time
Armijo-Rivera et al. (2026)	AI-based speaking time and facilitation analytics	To analyze instructor talk-time patterns and correlate with debriefing quality	Automated transcription + speech analytics	Higher instructor talk-time negatively correlated with DASH self-ratings	Small sample; cross-sectional; no learner outcome data
Tscholl et al. (2026)	Generative structured teamwork report generation	To support facilitator-led debriefing through structured communication reports	AI speech recognition + LLM-based report generation (ChatGPT-4o, Isaac)	Experts valued broader observation capture; learners expressed optimism with concerns about transparency and bias	Categorization inaccuracies; lack of contextual and nonverbal data; need for human-in-the-loop
