# Supplementary material
Source: Research Square preprint supplement (doi:10.21203/rs.3.rs-9261962/v1)
Supplement: Supplementary file 3 [file ad8c962f3f154978e97ef9c7.xlsx]

## Sheet: Sheet1
Author, year	Country	Aim	Profession	Study design	Participants	Sample Size	Data Collection Method	Purpose of AI use in debriefing	Types of AI methods	AI Function in Debriefing	Educational/practical outcomes	Limitations and ethical considerations
Brutschi et al., 2024	Switzerland	To explore the technical feasibility of audio-based speaker diarization for automatically measuring and visualizing debriefing interaction patterns among debriefers and participants in simulation-based healthcare education.	Undergraduate medical education	Observational feasibility study evaluating implementation of an algorithmic toolkit for speaker diarization and automated visualization	Third-year medical students participating in team-based simulation training; debriefings led by two experienced simulation instructors.	10 recorded debriefing sessions (5–10 students per session; 2 debriefers).	Audio recordings of post-simulation debriefings using a room microphone; machine learning–based audio denoising and speaker diarization (PyAnnote); manual reconciliation to validate automated speaker attribution; generation of bar charts, pie charts, and sociograms.	To automatically quantify and visualize interaction patterns (who speaks, when, for how long, and interaction flow) during debriefing sessions to support facilitator assessment and faculty development.	Machine learning–based speaker diarization using PyAnnote; audio denoising via FRCRN; algorithmic generation of social network visualizations.	Automatic identification of speakers and speech duration Generation of interaction metrics Production of visualizations (conversation flow charts, speaking distribution charts, sociograms) Quantification of student response rates triggered by debriefers	Demonstrated high technical accuracy of speaker diarization (mean accuracy 97.78%) Enabled objective visualization of interaction patterns Identified differences in engagement between debriefing sessions (e.g., debriefers triggered 28% vs 36% of student feedback in two sessions) Proposed utility for faculty development and structured feedback to debriefers	Small sample (10 debriefings) Same two instructors across sessions (limited generalizability) Single institutional context Potential attribution errors for short utterances (<10 seconds) Requires manual speaker labeling and human interpretation of visualizations No comparison with alternative assessment methods
Vaughn et al., 2025	United States	To evaluate the feasibility and usability of a generative AI-powered chatbot (SIM-U) designed to enhance simulation facilitators’ debriefing practices in nursing education.	Nursing simulation educators (pre-licensure nursing program)	Pilot feasibility and usability study using a post-test survey design guided by the Technology Acceptance Model (TAM).	Nursing simulation facilitators with 2–5 years of simulation experience.	6 facilitators	Audio-recorded facilitator debriefings Transcript upload into SIM-U Post-intervention TAM survey (5-point Likert scale) Open-ended qualitative responses Institutional Review Board approval (exempt)	To provide evidence-informed, personalized feedback to simulation facilitators to support continuous professional development and improve debriefing quality.	Generative AI chatbot using a large language model with Retrieval-Augmented Generation (RAG) trained on curated, evidence-based simulation standards and literature.	Transcript analysis of facilitator debriefings Evaluation against INACSL Standards, DASH, PEARLS, and best practice frameworks Personalized feedback and coaching suggestions Identification of reflective questioning patterns Evidence-linked recommendations with citations Avatar-based feedback interface	Feasible to develop a functioning AI feedback system Facilitators reported high perceived usefulness (TAM means 4.33–5.0) Generally high perceived ease of use (mean 4.17–5.0) Positive attitudes toward use Reported enhancement of self-reflection and awareness Actionable suggestions for improving debriefing strategies Perceived psychological safety in receiving AI feedback	Small convenience sample (n=6) Single academic institution Early-stage prototype Variable facilitator familiarity with AI technology Potential technological complexity No long-term outcome evaluation No comparison group
Jang et al., 2025	Republic of Korea	To develop and validate an instructional nursing simulation debriefing (NSD) model integrating question-centered learning (QcL) and AI prompt engineering, and to evaluate its effectiveness.	Undergraduate nursing students (fourth-year) and nursing simulation instructors	Design and development research (Type 2 Model Research) with convergent mixed-methods evaluation (one-group pre-post design + qualitative content analysis).	28 fourth-year nursing students (external validity testing) 3 experts for model validation 1 simulation instructor interviewed during development	28 students (effectiveness evaluation)	Literature review Instructor interviews Expert validation (Content Validity Index, Fleiss’ Kappa) Pre- and post-intervention surveys (VAS, MCQs) Wilcoxon signed-rank test Reflective journals (qualitative content analysis)	To integrate structured prompt engineering within simulation debriefing to enhance students’ clinical reasoning, creative thinking, AI competency, and reflective learning.	Use of ChatGPT 4.0 with structured prompt engineering techniques (zero-shot, few-shot, Chain-of-Thought prompting) embedded within a question-centered debriefing model.	Guided pre-scenario and post-scenario prompt-based reasoning Structured worksheet-driven AI interactions Alignment of prompt phases with debriefing stages Facilitation of analytical, critical, expansive, and creative questioning Support for reflective comparison between AI-generated reasoning and simulation performance	Quantitative results (Table 3, p. 4): Significant pre-post improvements (p < .001) in: AI utilization competency, Class interest, Knowledge, Skill, Attitude (confidence), Creativity competency, and Knowledge test scores. Qualitative findings: Improved clinical reasoning depth Increased interest and engagement Enhanced self-directed learning Recognition of importance of prompt engineering Developm…	Small sample (n = 28) Single university One-group design (no comparison group) Single scenario (ileus case) Limited generalizability across academic levels
Gonzalez & Nagendran, 2025	United States	To explore the relationship between time spent in an AI-facilitated debrief, the number of reflective performance dimensions demonstrated, and nursing students’ simulation performance scores.	Undergraduate nursing students (BSN medical-surgical course)	Pilot mixed-methods study integrating quantitative analysis (correlation, t-tests) and AI-generated thematic qualitative analysis.	52 nursing students from a large Southwest U.S. university	N = 52	Screen-based virtual simulation (Prioritization of Care™) AI-facilitated debrief via Relativ.ai conversational agent Audio-recorded student verbal reflections AI-generated transcript and performance dimension scoring Pearson correlation and independent t-tests AI-generated thematic synthesis	To facilitate structured, self-led reflective debriefing in an asynchronous simulation environment and to analyze spoken reflections across defined performance dimensions (confidence, authority, clarity, critical thinking).	Dual-model AI system (Relativ.ai): Conversational AI agent guiding structured debrief (EMPOWER® framework) Machine learning–based conversational intelligence and sentiment analysis evaluating reflective dimensions	Guided structured verbal reflection Real-time analysis of spoken responses Assessment across predefined dimensions (confidence, clarity, authority, critical thinking) Generation of immediate individualized feedback report AI-generated thematic synthesis of aggregate reflections	Quantitative findings: No significant correlation between time spent in AI debrief and simulation scores (r = 0.07, p = .46) Students meeting more reflective dimensions spent significantly less time in debrief (p < .001) No statistically significant difference in grades between high- and low-dimension groups. Qualitative findings: AI-generated themes highlighted tension between perceived confiden…	Single institution Underpowered pilot study Proprietary AI-defined performance dimensions Potential conflicts of interest (authors affiliated with Sentinel U and Relativ.ai) AI should not replace human-facilitated debriefing IRB approval obtained; de-identified data used
Rosser et al., 2023	United States	To evaluate whether natural language processing (NLP) can automatically detect changes in interprofessional trauma team communication practices following simulation debriefing and whether these changes align with improvements in T-NOTECHS scores.	Interprofessional trauma teams (trauma surgery residents, emergency medicine residents, and nurses)	Within-subjects pre–post simulation study comparing team performance before and after debriefing using NLP-based discourse analysis and T-NOTECHS scoring.	30 trauma teams (5 members per team) Total n = 150 trainees	30 teams (150 participants)	Audio and video recordings of simulated trauma resuscitations (Sim1 and Sim2) Faculty-scored T-NOTECHS ratings (3 raters, averaged) Directed content analysis to develop teamwork discourse codes Automated NLP coding using R text mining package Matched-pairs t-tests comparing pre- and post-debrief performance	To automate assessment of changes in trauma team communication practices following debriefing and to expedite team performance evaluation.	Natural Language Processing (NLP)–based automated discourse coding algorithms applied to simulation transcripts.	Automated coding of teamwork communication behaviors Detection of discourse elements aligned with T-NOTECHS domains Quantification of communication practices (e.g., verbalizing findings, directed communication, closed-loop communication) Comparison of discourse patterns before and after debriefing Potential foundation for real-time feedback systems	Post-debrief improvements observed in: Total T-NOTECHS scores (p < .05) Significant increases in NLP-coded behaviors: Verbalizing Findings Acknowledging Communication Directed Communication Directing Assessment and Role Assignment Using Leader as Hub for Information No significant changes observed in: Verbalizing Thought Process and Reasoning Making Summary Statements Avoiding Interrupting Others…	Manual transcription required (labor intensive) Some coding algorithms simplistic (“naive”) and not fully validated Improvements may reflect learning effect rather than debriefing alone No real-time implementation tested Dependence on accuracy of speech-to-text systems Funded study; no reported AI bias concerns
Armijo-Rivera et al., 2026	Chile	To analyze facilitation patterns of novice simulation instructors during debriefing using AI-based speech metrics and examine their relationship with perceived debriefing quality (DASH scores).	Multidisciplinary healthcare instructors (novice simulation instructors: physical therapists, nurses, midwives, occupational therapists, dietitians, speech therapists, psychologists)	Cross-sectional relational analytic study using AI-based conversational analysis of debriefing sessions.	15 novice healthcare simulation instructors (≤1 year experience).	n = 15 instructors	Audio-recorded remote interprofessional debriefings Automated transcription and speech analysis using GailBot API IBM Watson speech-to-text engine Calculation of speaking time percentages and intervention frequencies DASH evaluations completed by students, instructors, and expert observer Statistical analysis (Pearson/Spearman correlations)	To objectively analyze instructor speaking time and facilitation patterns during debriefing and explore their relationship with perceived debriefing quality.	AI-based automated transcription and conversational speech metrics using GailBot API and speech-to-text processing.	Automated transcription of debriefings Quantification of instructor vs. student speaking time Calculation of intervention counts and proportions Classification of facilitation levels based on time proportions Correlation analysis with DASH ratings Potential use for faculty development and real-time facilitation monitoring	Instructors spoke an average of 56.09% of total debriefing time Higher instructor talk time negatively correlated with DASH self-ratings Spearman’s Rho = −0.627, p = .012 Majority of novice instructors dominated conversation (51–70% speaking time) Proposed classification of facilitation levels based on time proportions Suggests AI-based metrics may support structured faculty development	Small sample size (n = 15) Homogeneous group of novice instructors Cross-sectional design Preliminary facilitation classification model Generalizability limited Institutional ethics approval obtained Data anonymized
Tscholl et al., 2026	Switzerland	To explore how generative AI tools can support teamwork observation and debriefing in immersive medical simulations, and to examine simulation experts’ and learners’ perceptions of AI-generated teamwork reports.	Anesthesia nurses, anesthesia residents, and anesthesia attending physicians	Qualitative exploratory study using thematic analysis of: AI-generated teamwork reports Expert feedback Learner interviews	41 healthcare professionals: Nurses (n = 16) Residents (n = 17) Attendings (n = 8)	41 simulation participants 26 AI-generated reports analyzed 27 learner interviews conducted	Audio-recorded immersive simulation scenarios AI-assisted real-time speech recognition (Isaac software) Transcripts analyzed by: Isaac (Saipient AI) ChatGPT-4o Structured prompt (Role Task Format) based on Team-FIRST framework AI-generated structured teamwork reports Expert written evaluations Semi-structured learner interviews Thematic analysis (Braun & Clarke approach)	To generate structured teamwork reports from simulation transcripts to support facilitator-led debriefing by organizing communication data and mapping it to the Team-FIRST framework.	Generative AI (Large Language Models) ChatGPT-4o (OpenAI) Isaac (Saipient AI) AI-based speech recognition and automated transcription Structured prompt engineering (Role Task Format)	AI-assisted transcription and generative analysis of team verbal communication, producing structured, framework-based (Team-FIRST) reports to augment facilitator observation and guide post-simulation debriefing.	From simulation experts: AI captured interactional details that facilitators might miss Structured quotes supported debriefing Broader observation capture Limitations identified: Categorization inaccuracies Speaker misidentification Overconfident interpretations Lack of contextual and nonverbal information From learners: Perceived benefits: efficiency, objectivity, enhanced perception Perceived r…	Single-center study Limited number of scenarios Reliance on text-based transcripts AI not domain-fine-tuned Risk of bias and hallucinations Absence of multimodal (video/nonverbal) integration Ethical approval obtained (BASEC ID: Req-2024-01642) Emphasis on Human-in-the-Loop (HITL) approach
