# Supplementary material
Source: Research Square preprint supplement (doi:10.21203/rs.3.rs-9261962/v1)
Supplement: Supplementary file 3 [file c29bf3c15817b05bd74ce647.docx]

**Table 1: Inclusion and exclusion criteria**

| Framework | Inclusion Criteria | Exclusion Criteria |
| --- | --- | --- |
| Population | Studies involving learners and/or educators in healthcare education across all levels (undergraduate, postgraduate, continuing professional development) and across all health professions. | Studies involving non-healthcare disciplines or non-educational populations. |
| Concept | Studies reporting the use of artificial intelligence (including machine learning, natural language processing, generative AI, or AI-driven analytics) explicitly applied to support simulation-based debriefing processes. | Studies examining AI in simulation without reference to debriefing; studies describing non-AI technologies; AI used solely for assessment without reflective or debriefing component. |
| Context | Conducted within simulation-based healthcare education settings. | Clinical event debriefings not conducted for educational purposes; non-simulation educational contexts. |
| Study Design | Empirical research studies (qualitative, quantitative, mixed methods), pilot or feasibility studies, implementation studies, and educational innovation reports describing actual AI application. | Editorials, commentaries, letters, opinion pieces, narrative reviews, systematic reviews, conference abstracts, theses, dissertations, and preprints. |
| Publication Characteristics | English-language, peer-reviewed publications; no date restrictions. | Non-English publications; non-peer-reviewed literature. |
